# Supplementary material for: Variation in the chemical composition of wheat straw: the role of tissue ratio and composition
Source: PubMed Central journal article supplement (PMC4243778; doi:10.1186/s13068-014-0121-y), 2014-08-20
Supplement: 13068_2014_121_MOESM4_ESM.pdf [file 13068_2014_121_MOESM4_ESM.pdf]

TABLE S4: CORRELATION TABLE FOR 2011

| score          |        |        |        |        |        |        |        |        |        |        |        |        |        |        |        |        |        |        |        |        |        |  |
|----------------|--------|--------|--------|--------|--------|--------|--------|--------|--------|--------|--------|--------|--------|--------|--------|--------|--------|--------|--------|--------|--------|--|
| height         |        |        |        |        |        |        |        |        |        |        |        |        |        |        |        |        |        |        |        |        |        |  |
| steml          | 0.993  |        |        |        |        |        |        |        |        |        |        |        |        |        |        |        |        |        |        |        |        |  |
| width          | 0.001  | -0.009 |        |        |        |        |        |        |        |        |        |        |        |        |        |        |        |        |        |        |        |  |
| tillers        | -0.004 | -0.011 | -0.062 |        |        |        |        |        |        |        |        |        |        |        |        |        |        |        |        |        |        |  |
| totwt          | 0.146  | 0.124  | -0.048 | 0.797  |        |        |        |        |        |        |        |        |        |        |        |        |        |        |        |        |        |  |
| wtear          | 0.609  | 0.588  | -0.075 | 0.529  | 0.715  |        |        |        |        |        |        |        |        |        |        |        |        |        |        |        |        |  |
| earwt          | -0.135 | -0.152 | -0.022 | 0.761  | 0.927  | 0.402  |        |        |        |        |        |        |        |        |        |        |        |        |        |        |        |  |
| smax           | 0.516  | 0.497  | 0.006  | -0.091 | 0.092  | 0.312  | -0.047 |        |        |        |        |        |        |        |        |        |        |        |        |        |        |  |
| fmax           | 0.131  | 0.124  | -0.018 | -0.019 | 0.057  | 0.047  | 0.049  | 0.012  |        |        |        |        |        |        |        |        |        |        |        |        |        |  |
| d2             | -0.097 | -0.092 | 0.019  | -0.053 | -0.071 | -0.165 | -0.005 | -0.446 | 0.809  |        |        |        |        |        |        |        |        |        |        |        |        |  |
| i              | 0.037  | 0.041  | 0.060  | -0.235 | -0.200 | -0.193 | -0.159 | 0.061  | 0.029  | 0.293  |        |        |        |        |        |        |        |        |        |        |        |  |
| moe            | 0.194  | 0.188  | -0.081 | 0.140  | 0.173  | 0.282  | 0.075  | 0.446  | -0.165 | -0.556 | -0.599 |        |        |        |        |        |        |        |        |        |        |  |
| mor            | 0.114  | 0.101  | -0.110 | 0.069  | 0.147  | 0.185  | 0.093  | 0.259  | 0.680  | 0.241  | -0.369 | 0.444  |        |        |        |        |        |        |        |        |        |  |
| xylose         | 0.338  | 0.353  | 0.099  | -0.340 | -0.278 | -0.134 | -0.290 | 0.211  | 0.220  | 0.173  | 0.141  | -0.011 | 0.072  |        |        |        |        |        |        |        |        |  |
| rhamnose       | -0.282 | -0.294 | -0.084 | 0.426  | 0.227  | 0.042  | 0.268  | -0.100 | -0.267 | -0.258 | -0.207 | 0.161  | -0.043 | -0.529 |        |        |        |        |        |        |        |  |
| mannose        | -0.117 | -0.127 | -0.061 | -0.003 | 0.015  | 0.099  | -0.026 | -0.057 | -0.214 | -0.200 | -0.147 | 0.056  | -0.088 | -0.717 | 0.074  |        |        |        |        |        |        |  |
| lignin         | 0.372  | 0.389  | -0.041 | -0.237 | -0.336 | -0.064 | -0.394 | 0.149  | 0.098  | 0.093  | 0.120  | -0.021 | 0.009  | 0.727  | -0.148 | -0.586 |        |        |        |        |        |  |
| glucose        | 0.637  | 0.629  | 0.129  | -0.079 | -0.012 | 0.260  | -0.132 | 0.344  | 0.132  | 0.023  | 0.118  | 0.101  | 0.059  | 0.397  | -0.230 | -0.303 | 0.486  |        |        |        |        |  |
| galactose      | -0.671 | -0.674 | -0.104 | 0.291  | 0.175  | -0.132 | 0.279  | -0.384 | -0.272 | -0.173 | -0.275 | 0.050  | -0.054 | -0.695 | 0.609  | 0.505  | -0.568 | -0.667 |        |        |        |  |
| fucose         | -0.393 | -0.391 | -0.069 | -0.139 | -0.054 | -0.332 | 0.081  | -0.132 | 0.042  | 0.068  | 0.043  | -0.097 | 0.014  | -0.035 | -0.031 | -0.061 | -0.315 | -0.642 | 0.165  |        |        |  |
| t_ferulic      | -0.247 | -0.256 | 0.014  | -0.031 | 0.067  | -0.213 | 0.179  | 0.025  | 0.114  | 0.031  | -0.024 | 0.036  | 0.124  | 0.009  | 0.109  | -0.308 | -0.264 | -0.318 | -0.028 | 0.753  |        |  |
| p_acetic       | 0.331  | 0.327  | 0.041  | -0.200 | -0.226 | 0.013  | -0.290 | 0.436  | 0.118  | -0.056 | 0.090  | 0.162  | 0.129  | 0.406  | 0.012  | -0.289 | 0.445  | 0.434  | -0.469 | -0.172 | 0.060  |  |
| benzoic        | -0.210 | -0.210 | -0.052 | -0.327 | -0.191 | -0.331 | -0.092 | -0.083 | 0.092  | 0.088  | -0.012 | -0.065 | 0.062  | 0.201  | -0.250 | -0.133 | -0.039 | -0.344 | -0.043 | 0.780  | 0.654  |  |
| c_coumaric     | -0.054 | -0.059 | 0.043  | -0.023 | -0.069 | -0.107 | -0.039 | 0.097  | 0.116  | 0.028  | -0.131 | 0.071  | 0.145  | 0.138  | 0.309  | -0.295 | 0.219  | -0.105 | -0.050 | 0.342  | 0.558  |  |
| benzaldehyde   | -0.322 | -0.308 | -0.075 | -0.202 | -0.111 | -0.362 | 0.023  | -0.166 | 0.155  | 0.160  | 0.092  | -0.122 | 0.114  | 0.208  | -0.124 | -0.380 | 0.078  | -0.295 | -0.013 | 0.643  | 0.695  |  |
| c_ferulic      | -0.377 | -0.364 | -0.134 | 0.008  | 0.031  | -0.204 | 0.130  | -0.325 | -0.200 | -0.050 | -0.040 | -0.029 | -0.109 | -0.129 | 0.083  | -0.016 | -0.229 | -0.343 | 0.383  | 0.388  | 0.116  |  |
| vanillic       | -0.322 | -0.325 | -0.092 | 0.169  | 0.270  | -0.015 | 0.347  | -0.337 | -0.016 | 0.079  | -0.060 | -0.095 | -0.031 | -0.428 | -0.110 | 0.236  | -0.596 | -0.199 | 0.313  | 0.207  | 0.256  |  |
| trux_FA        | -0.047 | -0.052 | -0.068 | 0.319  | 0.332  | 0.241  | 0.310  | -0.235 | -0.159 | -0.069 | -0.123 | 0.013  | -0.112 | -0.528 | 0.054  | 0.416  | -0.489 | 0.065  | 0.311  | -0.324 | -0.293 |  |
| trux_CA        | 0.134  | 0.126  | 0.047  | -0.181 | -0.179 | -0.101 | -0.179 | 0.277  | 0.171  | 0.051  | 0.061  | 0.090  | 0.177  | 0.460  | 0.106  | -0.578 | 0.518  | 0.163  | -0.391 | 0.249  | 0.479  |  |
| totp_unknown   | -0.274 | -0.278 | -0.010 | -0.075 | 0.047  | -0.245 | 0.169  | -0.017 | 0.132  | 0.068  | 0.028  | 0.008  | 0.142  | 0.074  | 0.037  | -0.379 | -0.178 | -0.305 | -0.030 | 0.743  | 0.953  |  |
| totsugars      | 0.574  | 0.566  | 0.172  | -0.131 | -0.105 | 0.151  | -0.201 | 0.347  | 0.153  | 0.046  | 0.124  | 0.084  | 0.066  | 0.549  | -0.186 | -0.463 | 0.631  | 0.938  | -0.703 | -0.528 | -0.193 |  |
| totphenolics   | -0.282 | -0.285 | -0.015 | -0.087 | 0.037  | -0.255 | 0.162  | -0.029 | 0.131  | 0.073  | 0.031  | 0.000  | 0.135  | 0.076  | 0.016  | -0.367 | -0.177 | -0.320 | -0.028 | 0.761  | 0.950  |  |
| proto_aldehyde | -0.224 | -0.228 | -0.160 | 0.272  | 0.245  | 0.138  | 0.246  | -0.336 | -0.153 | -0.008 | -0.044 | -0.055 | -0.101 | -0.551 | 0.090  | 0.434  | -0.396 | -0.167 | 0.444  | -0.088 | -0.253 |  |
| corr_lignin    | 0.442  | 0.461  | -0.042 | -0.187 | -0.268 | 0.016  | -0.344 | 0.172  | 0.109  | 0.112  | 0.179  | -0.028 | 0.000  | 0.739  | -0.212 | -0.630 | 0.973  | 0.547  | -0.646 | -0.382 | -0.307 |  |
| ash            | -0.151 | -0.152 | -0.010 | -0.280 | -0.367 | -0.298 | -0.329 | -0.007 | -0.039 | -0.095 | -0.204 | 0.049  | 0.037  | 0.051  | 0.216  | 0.160  | 0.278  | -0.080 | 0.172  | 0.133  | 0.056  |  |
| d804           | -0.489 | -0.506 | 0.036  | 0.256  | 0.340  | -0.088 | 0.468  | -0.246 | -0.092 | -0.068 | -0.116 | 0.030  | -0.001 | -0.583 | 0.280  | 0.212  | -0.764 | -0.346 | 0.507  | 0.445  | 0.556  |  |
| d88            | 0.071  | 0.058  | -0.005 | 0.074  | 0.217  | 0.071  | 0.241  | -0.004 | 0.024  | 0.015  | -0.057 | 0.046  | 0.015  | -0.032 | 0.018  | -0.164 | -0.222 | 0.323  | -0.130 | 0.218  | 0.458  |  |
| benzofuran     | -0.167 | -0.184 | 0.021  | 0.202  | 0.350  | 0.125  | 0.385  | -0.183 | 0.002  | 0.049  | -0.035 | -0.026 | -0.012 | -0.460 | -0.103 | 0.251  | -0.674 | -0.037 | 0.150  | 0.214  | 0.319  |  |
| d85            | -0.150 | -0.158 | -0.125 | 0.177  | 0.285  | 0.057  | 0.333  | -0.181 | -0.055 | 0.009  | -0.072 | 0.066  | -0.022 | -0.233 | 0.032  | -0.048 | -0.275 | 0.121  | 0.111  | 0.191  | 0.318  |  |
| d55            | -0.540 | -0.544 | 0.063  | -0.060 | -0.042 | -0.389 | 0.122  | -0.238 | -0.122 | -0.107 | -0.155 | 0.009  | -0.040 | -0.279 | 0.279  | 0.127  | -0.338 | -0.571 | 0.471  | 0.698  | 0.618  |  |
| node           | -0.090 | -0.090 | 0.007  | 0.033  | 0.113  | 0.082  | 0.106  | -0.236 | 0.052  | 0.167  | 0.076  | -0.153 | 0.003  | -0.136 | -0.371 | 0.161  | -0.136 | 0.008  | 0.087  | -0.193 | -0.295 |  |
| leaf           | -0.630 | -0.629 | -0.139 | 0.260  | 0.109  | -0.199 | 0.228  | -0.268 | -0.241 | -0.174 | -0.100 | 0.054  | -0.041 | -0.638 | 0.710  | 0.334  | -0.479 | -0.641 | 0.888  | 0.222  | 0.072  |  |
| inter          | 0.757  | 0.758  | 0.025  | -0.208 | -0.134 | 0.226  | -0.272 | 0.390  | 0.117  | -0.029 | 0.036  | 0.110  | 0.047  | 0.489  | -0.364 | -0.106 | 0.488  | 0.637  | -0.705 | -0.411 | -0.219 |  |
| ear            | 0.035  | 0.033  | 0.168  | -0.111 | 0.014  | 0.037  | 0.001  | -0.070 | 0.201  | 0.267  | 0.090  | -0.182 | 0.009  | 0.319  | -0.543 | -0.359 | 0.121  | 0.196  | -0.434 | 0.105  | 0.127  |  |

height steml width tillers totwt wtear earwt smax fmax d2 i moe mor xylose rhamnose mannose lignin glucose galactose fucose t\_ferulic
